# Supplementary material for: Core–shell TaOx@MnO2nanoparticles as a nano-radiosensitizer for effective cancer radiotherapy
Source: Royal Society of Chemistry journal article supplement (doi:10.1039/c8tb00070k), 2018-01-01
Supplement: c8tb00070k1.pdf [file c8tb00070k1.pdf]

# Supporting Information

## Core-shell TaOx@MnO<sub>2</sub> Nanoparticles as A Nano-radiosensitizer for Highly Effective Cancer Radiotherapy

Fei Gong<sup>a</sup>, Jiawen Chen<sup>a</sup>, Xiao Han<sup>a</sup>, Jiayue Zhao<sup>a</sup>, Mengyun Wang<sup>b</sup>, Liangzhu Feng<sup>a</sup>, Yonggang Li<sup>b</sup>,

Zhuang Liu<sup>a</sup>, and Liang Cheng<sup>\*a</sup>

<sup>a</sup>Institute of Functional Nano & Soft Materials (FUNSOM), Jiangsu Key Laboratory for Carbon-Based Functional Materials and Devices, Soochow University, Suzhou 215123, China.

<sup>b</sup>Department of Radiology the First Affiliated Hospital of Soochow University Suzhou, Jiangsu, 215006, China

Email: [lcheng2@suda.edu.cn](mailto:lcheng2@suda.edu.cn)

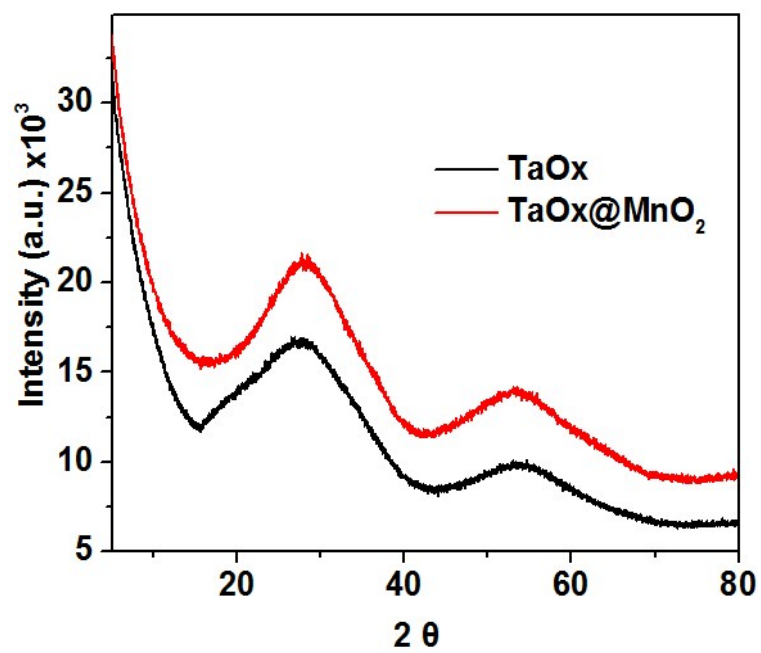

**Figure S1.** X-ray diffraction (XRD) spectra of TaOx and TaOx@MnO<sub>2</sub> nanoparticles.

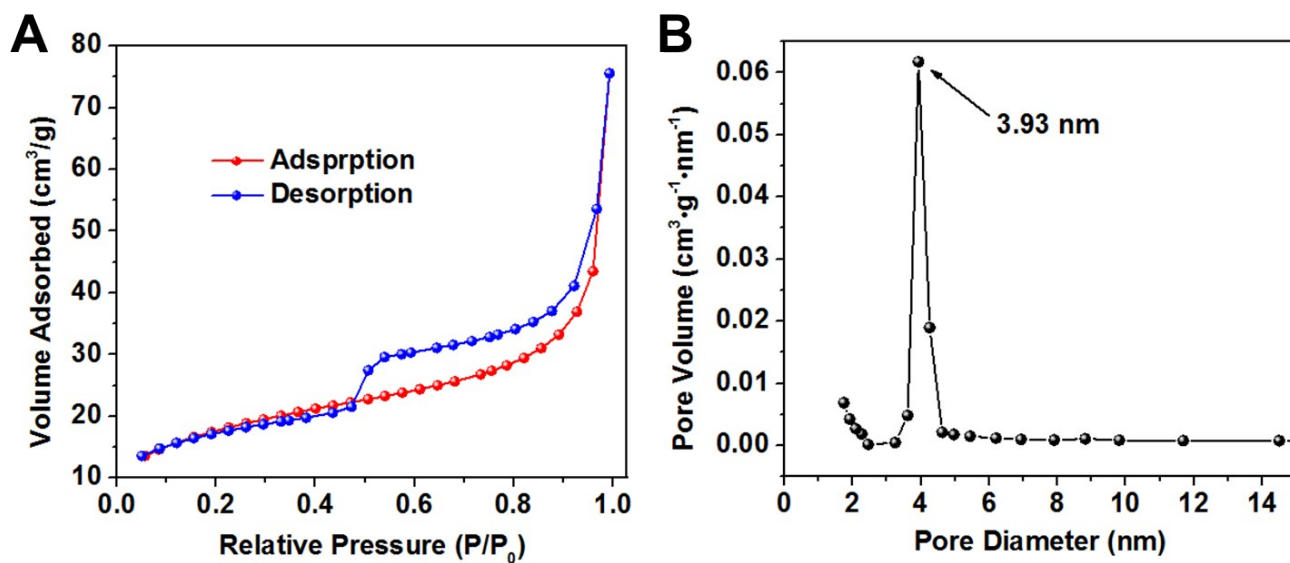

**Figure S2.**  $\text{N}_2$  adsorption/desorption isotherm and corresponding pore-size distribution curves of  $\text{TaO}_x$  nanoparticles.

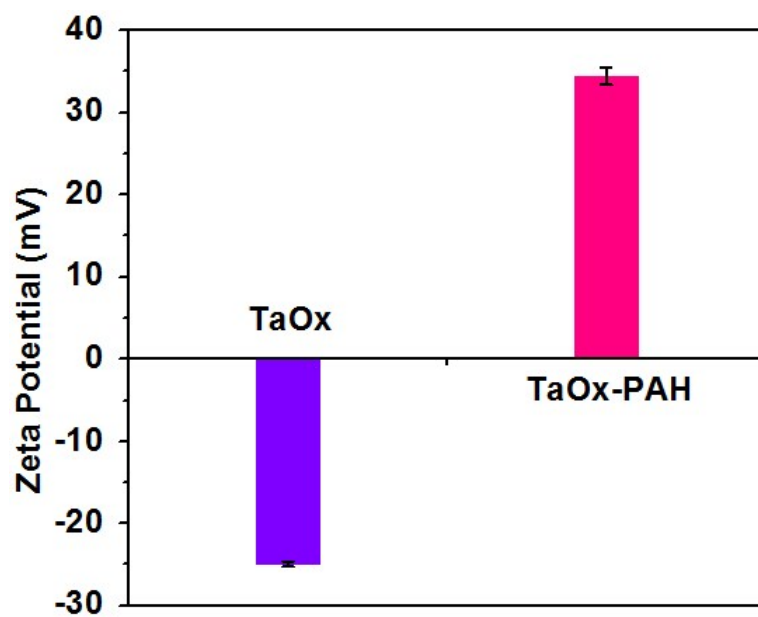

**Figure S3.** Zeta potentials of TaOx and TaOx-PAH nanoparticles.

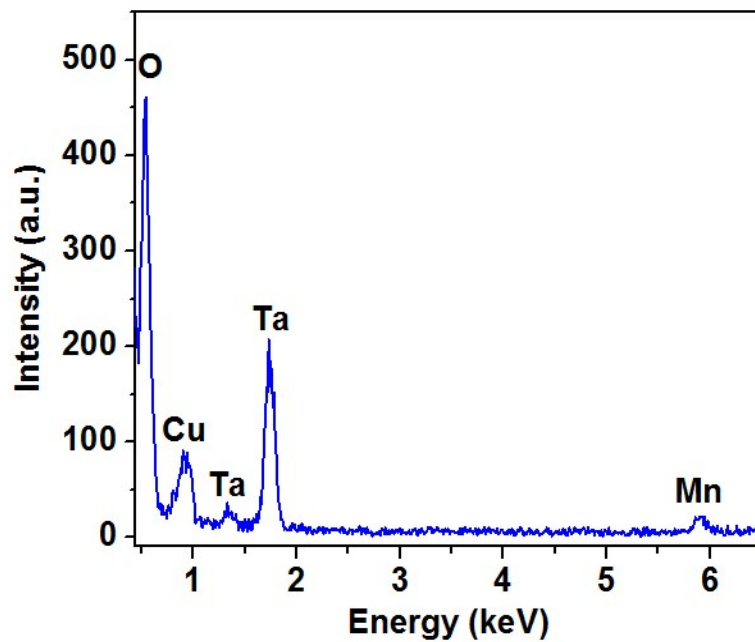

**Figure S4.** Energy dispersive spectra (EDX) of TaOx@MnO<sub>2</sub> nanoparticles.

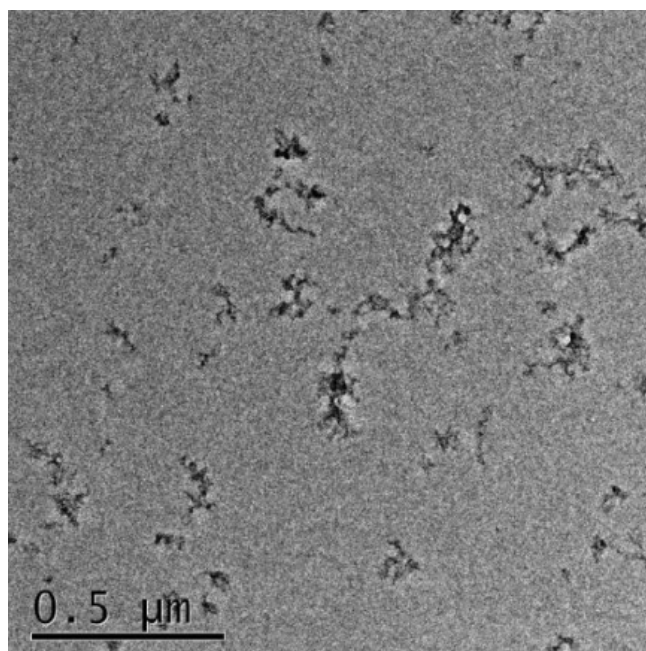

**Figure S5.** TEM image of MnO<sub>2</sub> nanoparticles.

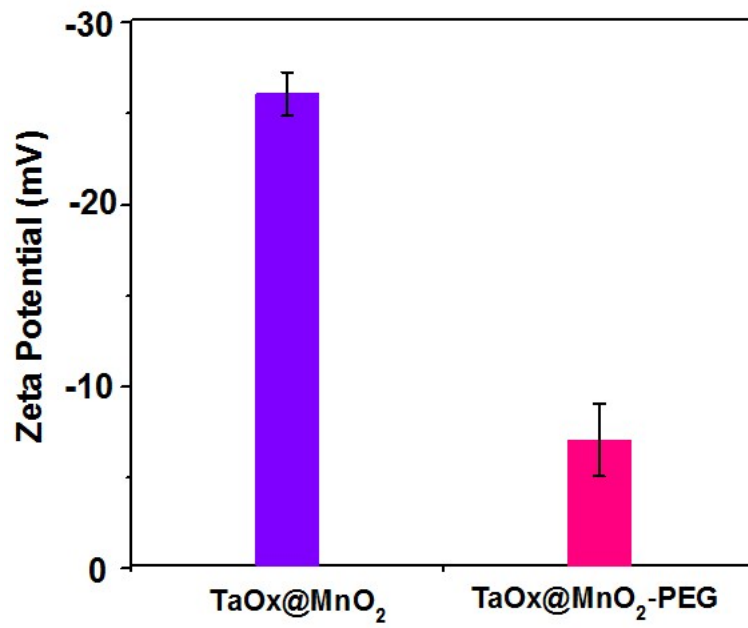

**Figure S6.** Zeta potentials of TaOx@MnO<sub>2</sub> and TaOx@MnO<sub>2</sub>-PEG nanoparticles.

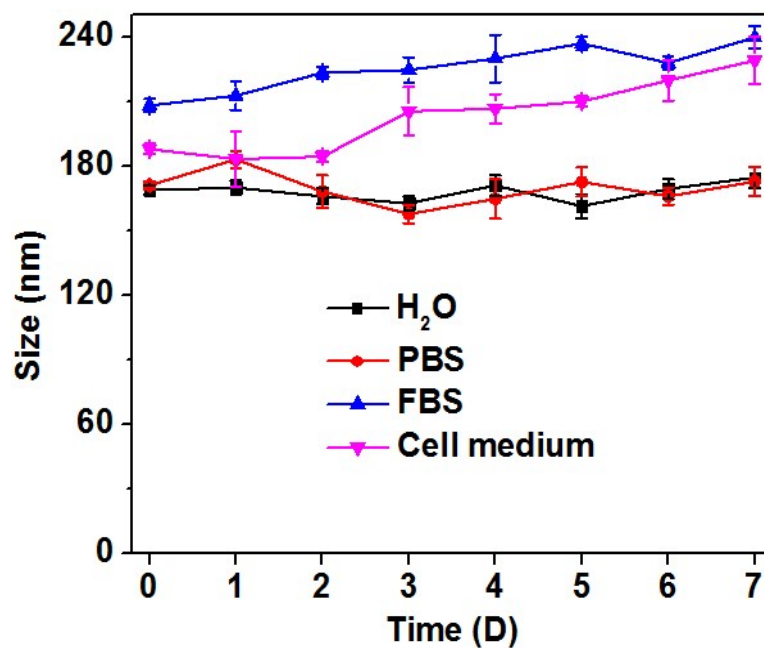

**Figure S7.** Hydrodynamic diameters of TaOx@MnO<sub>2</sub>-PEG nanoparticles in different solutions including H<sub>2</sub>O, PBS, FBS, and RPMI 1640 cell culture medium (containing 10% serum) for 7 days.



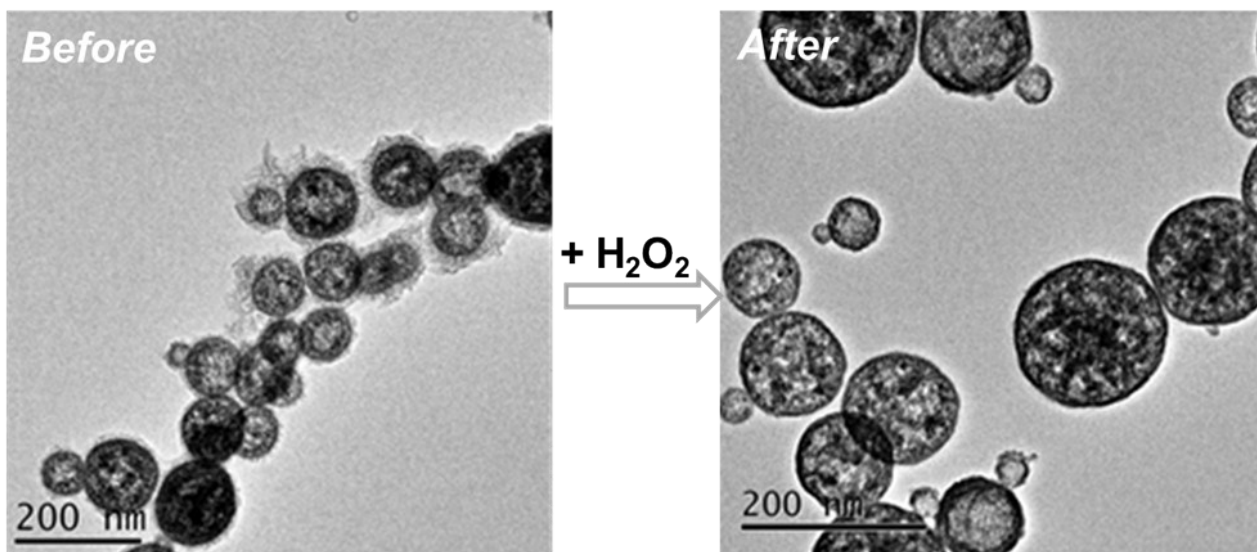

**Figure S8.** TEM images of TaOx@MnO<sub>2</sub> nanoparticles before and after the reaction with H<sub>2</sub>O<sub>2</sub> at acidic conditions.

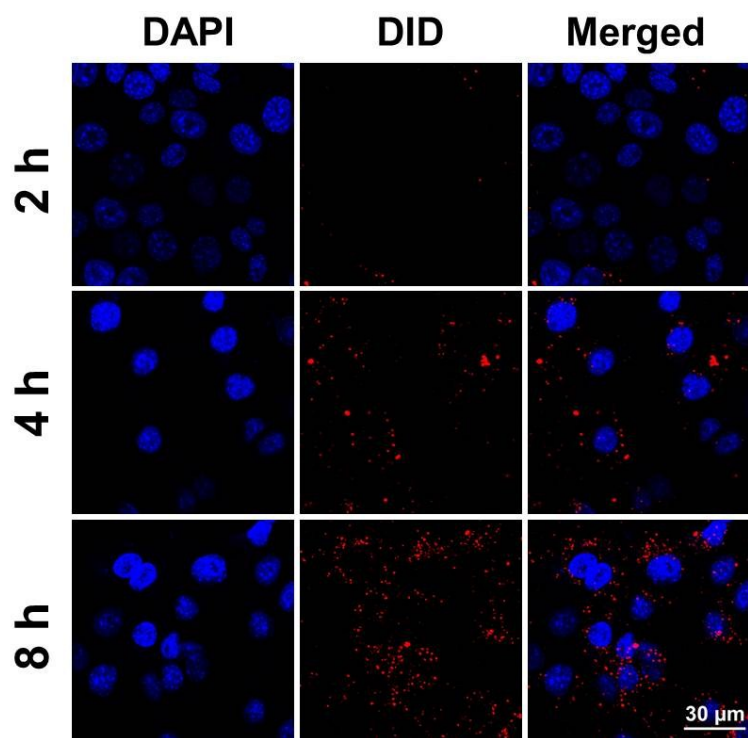

**Figure S9.** Confocal fluorescence images of 4T1 cells incubated with TaOx@MnO<sub>2</sub>-PEG for different periods of time. The red and blue colors represent DID fluorescence and DAPI-stained cell nuclei, respectively.

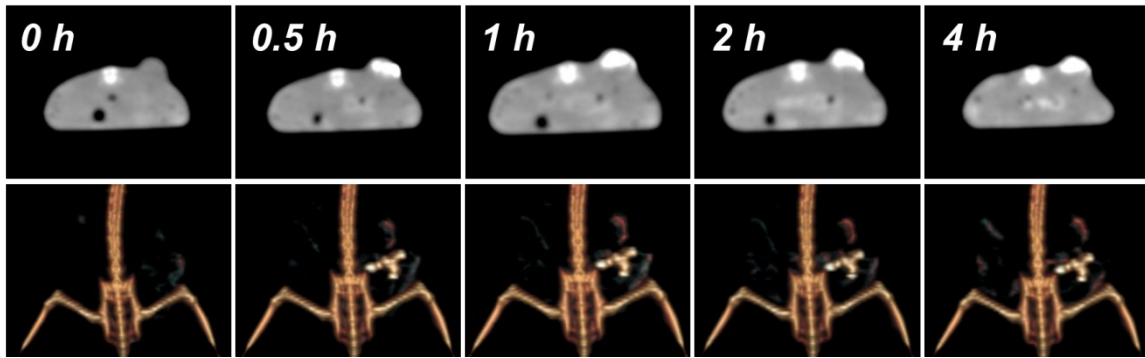

**Figure S10.** *In vivo* CT imaging of 4T1 tumor bearing mice at different time points (0 h, 0.5 h, 1h, 2 h, and 4 h).

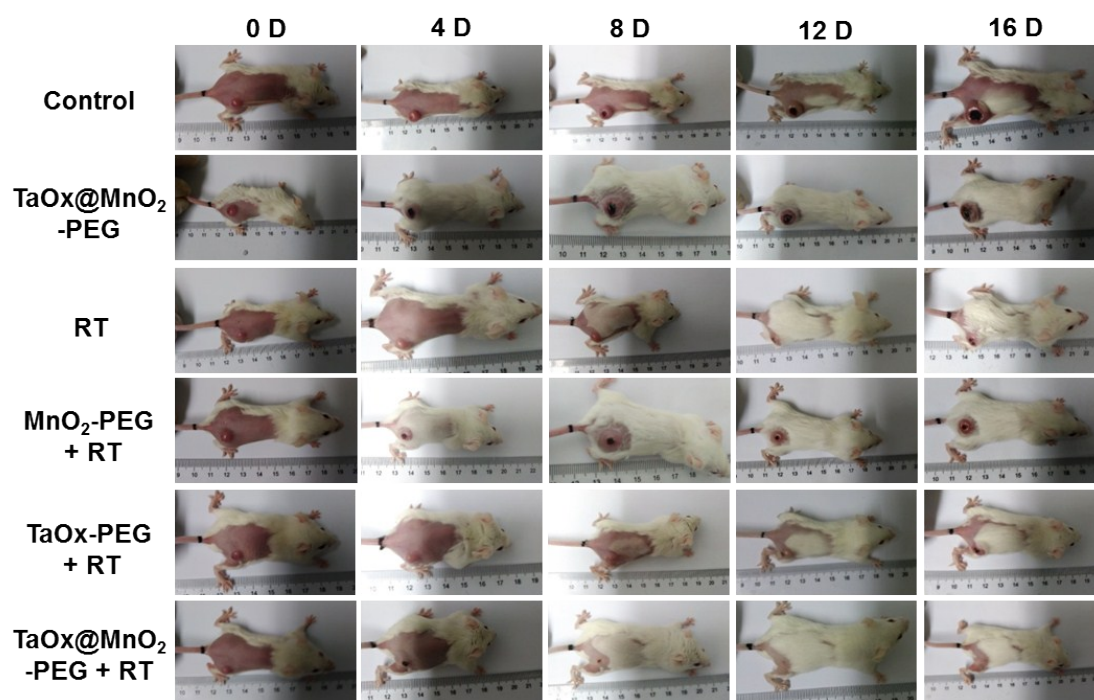

**Figure S11.** Photos of representative mice taken at every four days after various treatments.

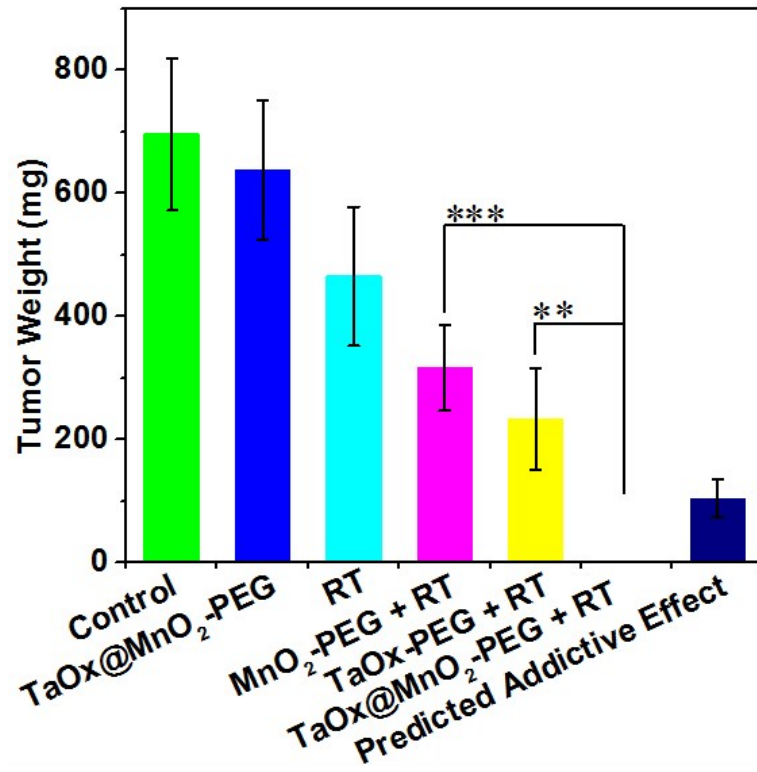

**Figure S12.** Averaged weights of tumors collected from different groups of mice at the 16<sup>th</sup> day post treatments.

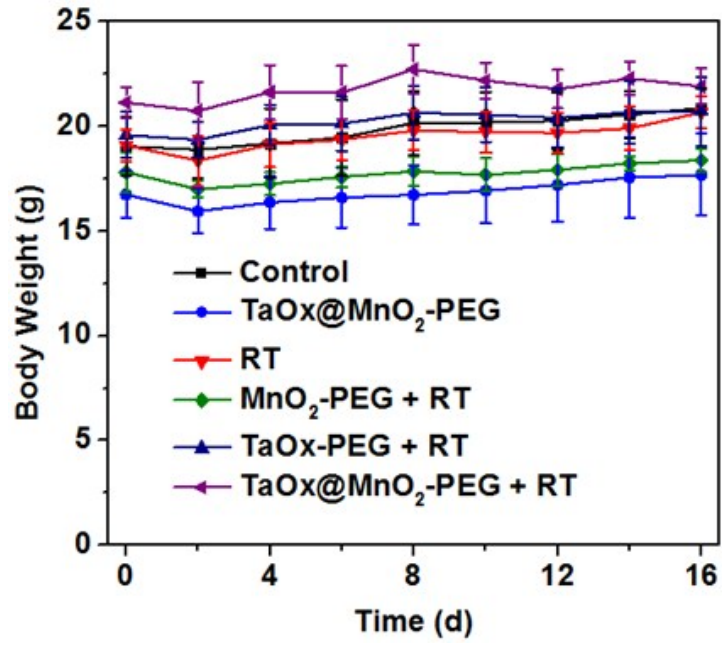

**Figure S13.** The body weight variation of 4T1 tumor-bearing mice during various treatments.
